# Supplementary material for: Recovery-oriented social work practice in mental health and addictions: a scoping review protocol
Source: PubMed Central journal article supplement — BMJ Open. 2020 Aug 20;10(8):e037777. doi: 10.1136/bmjopen-2020-037777 (PMC7440834; doi:10.1136/bmjopen-2020-037777), 2020-08-20
Supplement: bmjopen-2020-037777.draft_revisions.pdf [file bmjopen-2020-037777.draft_revisions.pdf]

# BMJ Open

BMJ Open is committed to open peer review. As part of this commitment we make the peer review history of every article we publish publicly available.

When an article is published we post the peer reviewers' comments and the authors' responses online. We also post the versions of the paper that were used during peer review. These are the versions that the peer review comments apply to.

The versions of the paper that follow are the versions that were submitted during the peer review process. They are not the versions of record or the final published versions. They should not be cited or distributed as the published version of this manuscript.

BMJ Open is an open access journal and the full, final, typeset and author-corrected version of record of the manuscript is available on our site with no access controls, subscription charges or pay-per-view fees (<http://bmjopen.bmj.com>).

If you have any questions on BMJ Open's open peer review process please email [info.bmjopen@bmj.com](mailto:info.bmjopen@bmj.com)

# BMJ Open

## Recovery-Oriented Social Work Practice in Mental Health and Addictions: A Scoping Review Protocol

|                               |                                                                                                                                                                                                                                                                                                                                                                                                                                                                 |
|-------------------------------|-----------------------------------------------------------------------------------------------------------------------------------------------------------------------------------------------------------------------------------------------------------------------------------------------------------------------------------------------------------------------------------------------------------------------------------------------------------------|
| Journal:                      | <i>BMJ Open</i>                                                                                                                                                                                                                                                                                                                                                                                                                                                 |
| Manuscript ID                 | bmjopen-2020-037777                                                                                                                                                                                                                                                                                                                                                                                                                                             |
| Article Type:                 | Protocol                                                                                                                                                                                                                                                                                                                                                                                                                                                        |
| Date Submitted by the Author: | 15-Feb-2020                                                                                                                                                                                                                                                                                                                                                                                                                                                     |
| Complete List of Authors:     | Kourgiantakis, Toula ; University of Toronto, Factor-Inwentash Faculty of Social Work<br>Hussain, Amina; University of Toronto, Factor-Inwentash Faculty of Social Work<br>Ashcroft, Rachelle; University of Toronto,<br>Logan, Judith; University of Toronto, John P. Robarts Library<br>McNeil, Sandra; University of Toronto, Factor-Inwentash Faculty of Social Work<br>Williams, Charmaine; University of Toronto, Factor-Inwentash Faculty of Social Work |
| Keywords:                     | EDUCATION & TRAINING (see Medical Education & Training), Protocols & guidelines < HEALTH SERVICES ADMINISTRATION & MANAGEMENT, PSYCHIATRY, Substance misuse < PSYCHIATRY                                                                                                                                                                                                                                                                                        |
|                               |                                                                                                                                                                                                                                                                                                                                                                                                                                                                 |

SCHOLARONE™  
Manuscripts

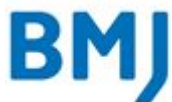

I, the Submitting Author has the right to grant and does grant on behalf of all authors of the Work (as defined in the below author licence), an exclusive licence and/or a non-exclusive licence for contributions from authors who are: i) UK Crown employees; ii) where BMJ has agreed a CC-BY licence shall apply, and/or iii) in accordance with the terms applicable for US Federal Government officers or employees acting as part of their official duties; on a worldwide, perpetual, irrevocable, royalty-free basis to BMJ Publishing Group Ltd ("BMJ") its licensees and where the relevant Journal is co-owned by BMJ to the co-owners of the Journal, to publish the Work in this journal and any other BMJ products and to exploit all rights, as set out in our [licence](#).

The Submitting Author accepts and understands that any supply made under these terms is made by BMJ to the Submitting Author unless you are acting as an employee on behalf of your employer or a postgraduate student of an affiliated institution which is paying any applicable article publishing charge ("APC") for Open Access articles. Where the Submitting Author wishes to make the Work available on an Open Access basis (and intends to pay the relevant APC), the terms of reuse of such Open Access shall be governed by a Creative Commons licence – details of these licences and which [Creative Commons](#) licence will apply to this Work are set out in our licence referred to above.

Other than as permitted in any relevant BMJ Author's Self Archiving Policies, I confirm this Work has not been accepted for publication elsewhere, is not being considered for publication elsewhere and does not duplicate material already published. I confirm all authors consent to publication of this Work and authorise the granting of this licence.

1  
2  
3  
4  
5  
6  
7  
8  
9 Recovery-Oriented Social Work Practice in Mental Health and Addictions:  
10 A Scoping Review Protocol  
11

12  
13 Toulou Kourgiantakis<sup>1</sup>

14  
15 Amina Hussain<sup>1</sup>

16  
17 Rachelle Ashcroft<sup>1</sup>

18  
19 Judith Logan<sup>2</sup>

20  
21 Sandra McNeil<sup>1</sup>

22  
23 Charmaine C. Williams<sup>1</sup>  
24  
25  
26  
27  
28  
29  
30  
31

32 <sup>1</sup> Factor-Inwentash Faculty of Social Work, University of Toronto, Toronto, ON, Canada

33  
34 <sup>2</sup> John P. Robarts Library, University of Toronto, Toronto, ON, Canada  
35  
36  
37  
38  
39  
40  
41  
42  
43  
44

45 Corresponding Author:  
46 Toulou Kourgiantakis, PhD, RSW, CCFT  
47 246 Bloor Street West  
48 Toronto, Ontario  
49 Canada M5S 1V4  
50 416-978-4176  
51 [toula.kourgiantakis@utoronto.ca](mailto:toula.kourgiantakis@utoronto.ca)  
52  
53

54  
55 Word count: 1248  
56  
57  
58  
59  
60

## ABSTRACT

**Introduction:** Social work is a key profession in the field of mental health worldwide and the profession has values that are aligned with a recovery paradigm. However, there are gaps in understanding how social workers are applying the recovery paradigm in practice. This study will scope and synthesize the literature related to recovery and social work practice in mental health and addictions. There will also be an exploration of best practices and gaps in recovery-oriented social work practice. **Methods and analysis:** Using a scoping review framework developed by Arksey and O'Malley, we will conduct our search in five academic databases: PsycINFO, Medline, CINAHL Plus, Sociological Abstracts, and Social Services Abstracts. Articles meeting inclusion criteria will be charted to extract relevant themes and analysed using a qualitative thematic analysis approach. **Ethics and dissemination:** This review will provide relevant information about best practices and gaps in recovery-oriented social work practice in mental health and addictions. The study will inform the development of mental health curricula in social work programs and clinical settings. Results will be disseminated through a peer-reviewed journal and at conferences focusing on mental health, addictions, and social work education. Ethics approval is not required for this scoping review.

### Strengths and Limitations of this Study

- This is the first comprehensive review of the recovery paradigm and social work practice in mental health and addictions
- The search strategy has been developed by a research team with expertise in the methodology and subject area
- Due to the nature of the scoping review framework, the studies included in the review will not be appraised for quality
- This scoping review will include all article types and methodologies, but will not include books or grey literature

For peer review only

## Introduction

Recovery is a paradigm with increasing influence on mental health systems and policies in many high-income countries over the last two decades,[1-3] and it is included in the World Health Organization's (WHO) Mental Health Action Plan.[4] The recovery paradigm was introduced in the 1980s by mental health consumers [5] as an alternative to the biomedical model focusing on illness, chronicity, and cure.[6] We will use the term paradigm defined by Kuhn as a "constellation of beliefs, values, techniques, and so on shared by the members of a given community".[7 p.175] Members of a community share assumptions and beliefs, practice using a specific paradigm, and pursue common goals. Practice interventions and theories are developed and shaped by paradigms.[8,9] Recovery has been defined as "a way of living a satisfying, hopeful, and contributing life even with limitations caused by illness".[9 p.15] Many countries have adopted common guiding principles for recovery that focus on 1) hope, 2) lived experiences, 3) individual, family, and community strengths, 4) self-determination, 5) peer support, 6) collaborative relationships, 7) a non-linear process, 8) a holistic approach, 9) cultural diversity, and 10) social inclusion, stigma, and discrimination.[10-12] Although many countries such as Canada have adopted a recovery framework for their national mental health strategy, researchers report challenges for mental health care professionals to implement recovery principles in practice and the culture of many systems of mental health care do not reflect a recovery paradigm.[2,3]

The social work profession has a longstanding history of important and unique contributions in the field of mental health.[13,14] The WHO identifies social work as a key profession in mental health across 149 countries.[4] In the United States, 50% of social workers are working directly in mental health, and most social workers engage with individuals and

1  
2  
3 families with mental health concerns even when working outside of this specific field.[15] The  
4 recovery paradigm is strongly aligned with social work values and conceptual frameworks  
5 promoting empowerment, partnership, and choice informed by ecosystems theory and a  
6 strengths-based model.[6,16] Despite social work's unique alignment with the recovery  
7 paradigm, researchers argue that social work has not had a strong voice in challenging and  
8 critiquing the dominant biomedical model.[16,17] There are gaps in understanding the extent to  
9 which social workers are applying recovery guiding principles in practice.[17,18] Researchers  
10 have identified several impediments to implementation, including the lack of a universal  
11 definition of recovery-oriented care and a paucity of evidence-based research to inform  
12 practice.[17-19] The organizational context may also influence implementation by pressuring  
13 social workers to adhere to institutional policies and procedures that may be incongruent with  
14 recovery principles.[17]

15  
16  
17  
18  
19  
20  
21  
22  
23  
24  
25  
26  
27  
28  
29  
30  
31 Williams and colleagues [19] argue that recovery does not adequately address  
32 sociopolitical issues related to power and control over mental health care. Social work's core  
33 value of social justice can make valuable contributions to advancing how recovery is  
34 implemented in mental health care systems; however, social work has also been critiqued for its  
35 conformity with dominant structural systems that are not recovery-oriented and perpetuate  
36 stigma and discrimination.[19] Considering the important role of social workers internationally,  
37 we need a greater understanding of how social workers are conceptualizing and implementing  
38 recovery in mental health and addictions.[12] This paper delineates a protocol for a scoping  
39 review on the recovery paradigm in social work in mental health and addictions. The objectives  
40 of this review are to (1) scope the literature related to the recovery paradigm in social work in  
41 mental health and addictions, (2) synthesize definitions, principles, and values related to  
42  
43  
44  
45  
46  
47  
48  
49  
50  
51  
52  
53  
54  
55  
56  
57  
58  
59  
60



1  
2  
3 recovery-oriented social work practice in mental and addictions, (3) describe how recovery is  
4 implemented in social work practice, and (4) identify evidence-based practices and gaps in  
5 recovery-oriented social work practice in mental health and addictions.  
6  
7  
8

## 9 10 **METHODS AND ANALYSIS**

11  
12 A scoping review will be conducted to map existing literature on recovery-oriented  
13 practice within social work education, research, and practice in mental health and addictions.  
14  
15 Scoping reviews involve systematically mapping recurring themes, concepts, and identifying  
16 recommendations from the current literature as they relate to the research question at hand.[20]  
17  
18 This study will employ the scoping review framework espoused by Arksey and O'Malley [21]  
19 which consists of five stages: 1) identifying the research question; 2) identifying relevant studies;  
20  
21 3) study selection; 4) charting the data; and 5) collating, summarizing and reporting the results.  
22  
23 Given the nature of this exploratory study, this form of knowledge synthesis will be valuable in  
24 providing a breadth of literature pertaining to the recovery paradigm within social work  
25 education, research, and practice. We will adhere to the PRISMA Extension for Scoping  
26 Reviews (PRISMA-ScR) reporting guidelines.[22] See Appendix A for the PRISMA-ScR  
27 checklist.  
28  
29  
30  
31  
32  
33  
34  
35  
36  
37  
38  
39

### 40 **Stage 1: identifying the research questions**

41  
42 As highlighted throughout our literature review, recovery is central to social work  
43 practice and there have been no studies charting the evidence on the recovery paradigm in social  
44 work education, research and practice in mental health and addictions. Based on  
45 recommendations by Colquhoun, Levac, O'Brien, et al.[23] the research questions for this  
46  
47 scoping review were developed collaboratively by our research team consisting of three social  
48  
49  
50  
51  
52  
53  
54  
55  
56  
57  
58  
59  
60

1  
2  
3 work faculty members (TK, RA, CCW), one social sciences librarian (JL), and two social work  
4  
5 doctoral students (AH, SM).  
6

7  
8 The research team developed the following research questions: 1) How is the recovery-  
9  
10 paradigm conceptualized and defined in social work practice in mental health and addictions? 2)  
11  
12 What are the principles and values of recovery in social work? 3) How is the recovery paradigm  
13  
14 used in social work practice, education, and research? 4) What are the gaps, challenges or  
15  
16 barriers of recovery in social work? 5) What are the recommendations, evidence-based or best  
17  
18 practices for using a recovery paradigm in social work research, education, and practice?  
19  
20

## 21 **Stage 2: identifying relevant studies**

22  
23  
24 The initial search strategy was developed in PsycINFO (Ovid, 1806-) by the social  
25  
26 sciences librarian (JL) in consultation with other team members. See Table 1 for the draft search  
27  
28 strategy in PsycINFO. It will be sent to a second librarian for peer review, using the Peer Review  
29  
30 of Electronic Search Strategies (PRESS) framework.[24] Any subsequent feedback will be  
31  
32 incorporated to enhance the breadth and scope of articles generated from the search. Our search  
33  
34 strategy will be conducted in five academic databases: PsycINFO (1806-), Medline (1946 -),  
35  
36 CINAHL Plus (1937-), Sociological Abstracts (1952-), and Social Services Abstracts (1979-).  
37  
38 These databases were intentionally selected for their inclusion of mental health literature, as well  
39  
40 as research on social work practice and education, and thus are likely to capture relevant  
41  
42 scholarly material. Furthermore, we will conduct a citation search of the reference lists of  
43  
44 selected articles to ensure a wider scope of articles are included.  
45  
46  
47  
48  
49  
50  
51  
52  
53  
54  
55  
56  
57  
58  
59  
60

**Table 1: Search Strategy for Ovid PsycINFO (1806-)**

| #  | Searches                                                                                                                                                                                                                              |
|----|---------------------------------------------------------------------------------------------------------------------------------------------------------------------------------------------------------------------------------------|
| 1  | social work*.tw.                                                                                                                                                                                                                      |
| 2  | casework*.tw.                                                                                                                                                                                                                         |
| 3  | case work*.tw.                                                                                                                                                                                                                        |
| 4  | social workers/                                                                                                                                                                                                                       |
| 5  | psychiatric social workers/                                                                                                                                                                                                           |
| 6  | Social case work/                                                                                                                                                                                                                     |
| 7  | or/1-6 [social work]                                                                                                                                                                                                                  |
| 8  | (recover* adj3 (care or practic* or educat* or curricul* or teach* or learn* or train* or research* or therap* or support* or orient* or approach* or model? or health or mental health or institutional or capital or natural*)).tw. |
| 9  | "recovery (disorders)"/                                                                                                                                                                                                               |
| 10 | exp Rehabilitation/                                                                                                                                                                                                                   |
| 11 | recover*.tw.                                                                                                                                                                                                                          |
| 12 | 10 and 11                                                                                                                                                                                                                             |
| 13 | 8 or 9 or 12                                                                                                                                                                                                                          |
| 14 | 7 and 13                                                                                                                                                                                                                              |

### Stage 3: study selection

After generating a list of articles from our search strategy we will engage in an iterative, peer review two-stage screening process with two independent reviewers at each stage. In the first stage, two independent reviewers will screen articles for suitability based on their title and abstracts. In the second stage, the reviewers will independently conduct a full text review of the selected articles to ensure their content meets our inclusion criteria outlined below. If there is ambiguity on whether certain articles fit the scope of this protocol, a third reviewer will be consulted. We will use Covidence – a web-based software for systematic and scoping reviews that facilitates screening, study selection, and data extraction.[25] This protocol will focus on articles written in English only, and selected material will include empirical studies, literature reviews, dissertations, teaching articles, and conceptual/theoretical papers. There are no outlined geographical or date restrictions. Articles must meet the following inclusion criteria to be selected: (1) include the term recovery in the title or abstract, (2) use the term social work or social worker in the title or abstract, (3) have an explicit focus on recovery which may include different concepts such as recovery, recovery model, recovery-oriented practice, recovery-oriented care etc., (4) explicitly focus on social work research, education, training, or practice in relationship to recovery, and (5) focus on recovery with respect to mental health and/or addictions. We will exclude books, book reviews, editorials, and gray literature.

### Stage 4: charting the data

Key themes extracted from the selected articles will be categorized, summarized, and presented clearly within a data charting form. The research team developed initial charting variables based on the research questions and these variables will be used to extract data and identify key themes from selected articles. The preliminary variables that will be used to categorize information

1  
2  
3 include (1) authors, (2) year, (3) country where study was conducted or country of first author's  
4 affiliation, (4) journal, (5) format of paper (empirical, literature review, dissertation,  
5 conceptual/theoretical, editorial, teaching article, etc.), (6) definition of recovery, (7) principles  
6 of recovery, (8) area of focus (e.g. mental health, addictions, etc.), (9) implementation of  
7 recovery (10) targeted audience (e.g. students, service users, social workers etc.), (11) focus on  
8 equity or access, (12) focus on stigma, (13) focus on race, culture, and/or diversity (14) gaps,  
9 challenges or barriers, and (15) recommendations, evidence-based or best practices. To assess  
10 whether these headings accurately capture the scope and breadth of the content, the reviewers  
11 will have two research assistants independently chart the first five articles that meet our inclusion  
12 criteria and if necessary, refine the definitions for the variables/charting categories. We will also  
13 engage in a constant comparative method and peer review to minimize any discrepancies during  
14 the charting process. The researchers will also engage in a qualitative thematic analysis to  
15 identify and highlight themes present amongst this chart. The charted data will be organized and  
16 presented in a Microsoft Excel spreadsheet.

### 34 **Stage 5: identification, synthesis, and report of study findings**

35 Findings outlined in the charted data will be reviewed, synthesized, and analyzed through a  
36 numerical summary analysis, as well as a qualitative thematic analysis. The final scoping review  
37 will be presented in publications and at upcoming conferences. Study findings will be  
38 disseminated to relevant stakeholders, such as researchers, clinicians, and social work educators.  
39 Anticipated findings are expected to map out the current nature and scope of recovery in social  
40 work practice in mental health and addictions, and the scoping review will provide  
41 recommendations for recovery-oriented social work practice in mental health and addictions.  
42  
43  
44  
45  
46  
47  
48  
49  
50  
51  
52

## Patients and public involvement

No patients nor members of the public were involved in this project.

## ETHICS AND DISSEMINATION

The scoping review outlined in this paper contributes to our current understanding and will advance knowledge of recovery-oriented social work practice in mental health and addictions.

The information gathered for this paper and the outlined scoping review were retrieved from publicly available sources, therefore ethics approval is not required for this project. The results will be disseminated through a peer-reviewed journal and reported at national and international conferences on mental health and addictions, as well as social work education, practice and research.

**Contributions of authors:** All authors made substantive intellectual contributions to the development of this protocol. TK and AH developed, wrote, and edited the initial protocol. JL developed the search strategy and contributed to the writing of the protocol. All authors (TK, AH, JL, RA, CCW) critically reviewed and revised the final version prior to submission.

**Funding:** This scoping review protocol is supported by a 2019-2020 Royal Bank of Canada Graduate Fellowship in Applied Social Work Research, Factor-Inwentash Faculty of Social Work, University of Toronto.

**Competing interests:** None declared.

**Data sharing statement:** The dataset is available by contacting the corresponding author.

## References

1. Adams N, Daniels A, Compagni A. International pathways to mental health transformation. *Int J Ment Health* 2009;38(1):30-45.
2. Kidd SA, McKenzie KJ, Virdee G. Mental health reform at a systems level: widening the lens on recovery-oriented care. *Can J Psychiatry* 2014;59(5):243-9.
3. Piat M, Sabetti J. The development of a recovery-oriented mental health system in Canada: what the experience of commonwealth countries tells us. *Can J Commun Ment Health* 2009;28(2):17-33.
4. WHO. *Mental health action plan 2013-2020*. Geneva: World Health Organization, 2013.
5. Deegan PE. Recovery: The lived experience of rehabilitation. *Psychosocial rehabilitation journal* 1988;11(4):11.
6. Carpenter J. Mental health recovery paradigm: Implications for social work. *Health Soc Work* 2002;27(2):86-94.
7. Kuhn TS. *The structure of scientific revolutions*. University of Chicago press; 2012 Apr 18.
8. Ashcroft R, Van Katwyk T, Hogarth K. An examination of the holism paradigm: A view of social work. *Social work in public health. Soc Work Public Health* 2017;32(8):461-74.
9. Anthony WA. Recovery from mental illness: the guiding vision of the mental health service system in the 1990s. *J Psychosoc Rehabil* 1993;16(4):11.
10. Mental Health Commission of Canada. *Guidelines for recovery-oriented practice*. Ottawa: Mental Health Commission of Canada; 2015.
11. Commonwealth of Australia. *A national framework for recovery-oriented mental health services: policy and theory*.
12. Substance Abuse and Mental Health Services Administration (SAMHSA). *SAMHSA'S working definition of recovery: 10 guiding principles of recovery*. Department of Health and Human Services; 2012. 1-7.
13. Ashcroft R, Van Katwyk T. Joining the global conversation: Social workers define health using a participatory action research approach. *Br J Soc Work* 2017;47(2):579-96.
14. Ashcroft R, Kourgiantakis T, Fearing G, Robertson T, Brown JB. Social work's scope of practice in primary mental health care: a scoping review. *Br J Soc Work* 2019;49(2):318-34.
15. Whitaker T, Weismiller T, Clark E. *Assuring the sufficiency of a frontline workforce: A national study of licensed social workers*. Executive summary: 2006.

16. Hyde B, Bowles W, Pawar M. 'We're Still in There'—Consumer Voices on Mental Health Inpatient Care: Social Work Research Highlighting Lessons for Recovery Practice. *Br J Soc Work* 2015;45(suppl\_1): i62-i78.
17. Khoury E, Rodriguez del Barrio L. Recovery-oriented mental health practice: A social work perspective. *Br J Soc Work* 2015;45(suppl\_1): i27-44.
18. Loumpa V. Promoting recovery through peer support: Possibilities for social work practice. *Health Soc Work* 2012;51(1):53-65.
19. Williams CC, Almeida M, Knyahnytska Y. Towards a biopsychosociopolitical frame for recovery in the context of mental illness. *Br J Soc Work* 2015;45(suppl\_1): i9-i26.
20. Levac D, Colquhoun H, O'Brien KK. Scoping studies: advancing the methodology. *Implement Sci* 2010;5(1):69.
21. Arksey H, O'Malley L. Scoping studies: towards a methodological framework. *Int J Soc Res Methodol* 2005;8(1):19–32.
22. Tricco AC, Lillie E, Zarin W, O'Brien KK, Colquhoun H, Levac D, Moher D, Peters MD, Horsley T, Weeks L, Hempel S. PRISMA extension for scoping reviews (PRISMA-ScR): checklist and explanation. *Ann Intern Med* 2018;169(7):467-73.
23. Colquhoun HL, Levac D, O'Brien KK, Straus S, Tricco AC, Perrier L, Kastner M, Moher D. Scoping reviews: time for clarity in definition, methods, and reporting. *J Clin Epidemiol* 2014;67(12):1291-4.
24. McGowan J, Sampson M, Salzwedel DM, Cogo E, Foerster V, Lefebvre C. PRESS peer review of electronic search strategies: 2015 guideline statement. *J Clin Epidemiol* 2016;75:40-6.
25. Macdonald M, Misener RM, Weeks L, Helwig M. Covidence vs Excel for the title and abstract review stage of a systematic review. *Int J Evid Based Healthc* 2016 1;14(4):200-201.



## Appendix A - Preferred Reporting Items for Systematic reviews and Meta-Analyses extension for Scoping Reviews (PRISMA-ScR) Checklist<sup>i</sup>

| SECTION                                               | ITEM | PRISMA-ScR CHECKLIST ITEM                                                                                                                                                                                                                                                                                  | REPORTED ON PAGE #                    |
|-------------------------------------------------------|------|------------------------------------------------------------------------------------------------------------------------------------------------------------------------------------------------------------------------------------------------------------------------------------------------------------|---------------------------------------|
| <b>TITLE</b>                                          |      |                                                                                                                                                                                                                                                                                                            |                                       |
| Title                                                 | 1    | Identify the report as a scoping review.                                                                                                                                                                                                                                                                   | 1                                     |
| <b>ABSTRACT</b>                                       |      |                                                                                                                                                                                                                                                                                                            |                                       |
| Structured summary                                    | 2    | Provide a structured summary that includes (as applicable): background, objectives, eligibility criteria, sources of evidence, charting methods, results, and conclusions that relate to the review questions and objectives.                                                                              | 2                                     |
| <b>INTRODUCTION</b>                                   |      |                                                                                                                                                                                                                                                                                                            |                                       |
| Rationale                                             | 3    | Describe the rationale for the review in the context of what is already known. Explain why the review questions/objectives lend themselves to a scoping review approach.                                                                                                                                   | 4-6                                   |
| Objectives                                            | 4    | Provide an explicit statement of the questions and objectives being addressed with reference to their key elements (e.g., population or participants, concepts, and context) or other relevant key elements used to conceptualize the review questions and/or objectives.                                  | 5-6                                   |
| <b>METHODS</b>                                        |      |                                                                                                                                                                                                                                                                                                            |                                       |
| Protocol and registration                             | 5    | Indicate whether a review protocol exists; state if and where it can be accessed (e.g., a Web address); and if available, provide registration information, including the registration number.                                                                                                             | Protocol in BMJ Open                  |
| Eligibility criteria                                  | 6    | Specify characteristics of the sources of evidence used as eligibility criteria (e.g., years considered, language, and publication status), and provide a rationale.                                                                                                                                       | 9                                     |
| Information sources*                                  | 7    | Describe all information sources in the search (e.g., databases with dates of coverage and contact with authors to identify additional sources), as well as the date the most recent search was executed.                                                                                                  | 7 for sources (date N/A for protocol) |
| Search                                                | 8    | Present the full electronic search strategy for at least 1 database, including any limits used, such that it could be repeated.                                                                                                                                                                            | 8                                     |
| Selection of sources of evidence†                     | 9    | State the process for selecting sources of evidence (i.e., screening and eligibility) included in the scoping review.                                                                                                                                                                                      | 9                                     |
| Data charting process‡                                | 10   | Describe the methods of charting data from the included sources of evidence (e.g., calibrated forms or forms that have been tested by the team before their use, and whether data charting was done independently or in duplicate) and any processes for obtaining and confirming data from investigators. | 9-10                                  |
| Data items                                            | 11   | List and define all variables for which data were sought and any assumptions and simplifications made.                                                                                                                                                                                                     | Preliminary variables on 9-10         |
| Critical appraisal of individual sources of evidence§ | 12   | If done, provide a rationale for conducting a critical appraisal of included sources of evidence; describe                                                                                                                                                                                                 | N/A                                   |

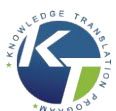

| SECTION                                       | ITEM | PRISMA-ScR CHECKLIST ITEM                                                                                                                                                                       | REPORTED ON PAGE # |
|-----------------------------------------------|------|-------------------------------------------------------------------------------------------------------------------------------------------------------------------------------------------------|--------------------|
|                                               |      | the methods used and how this information was used in any data synthesis (if appropriate).                                                                                                      |                    |
| Synthesis of results                          | 13   | Describe the methods of handling and summarizing the data that were charted.                                                                                                                    | 10                 |
| <b>RESULTS</b>                                |      |                                                                                                                                                                                                 |                    |
| Selection of sources of evidence              | 14   | Give numbers of sources of evidence screened, assessed for eligibility, and included in the review, with reasons for exclusions at each stage, ideally using a flow diagram.                    | N/A                |
| Characteristics of sources of evidence        | 15   | For each source of evidence, present characteristics for which data were charted and provide the citations.                                                                                     | N/A                |
| Critical appraisal within sources of evidence | 16   | If done, present data on critical appraisal of included sources of evidence (see item 12).                                                                                                      | N/A                |
| Results of individual sources of evidence     | 17   | For each included source of evidence, present the relevant data that were charted that relate to the review questions and objectives.                                                           | N/A                |
| Synthesis of results                          | 18   | Summarize and/or present the charting results as they relate to the review questions and objectives.                                                                                            | N/A                |
| <b>DISCUSSION</b>                             |      |                                                                                                                                                                                                 |                    |
| Summary of evidence                           | 19   | Summarize the main results (including an overview of concepts, themes, and types of evidence available), link to the review questions and objectives, and consider the relevance to key groups. | N/A                |
| Limitations                                   | 20   | Discuss the limitations of the scoping review process.                                                                                                                                          | 3 for protocol     |
| Conclusions                                   | 21   | Provide a general interpretation of the results with respect to the review questions and objectives, as well as potential implications and/or next steps.                                       | N/A                |
| <b>FUNDING</b>                                |      |                                                                                                                                                                                                 |                    |
| Funding                                       | 22   | Describe sources of funding for the included sources of evidence, as well as sources of funding for the scoping review. Describe the role of the funders of the scoping review.                 | 11                 |

JBI = Joanna Briggs Institute; PRISMA-ScR = Preferred Reporting Items for Systematic reviews and Meta-Analyses extension for Scoping Reviews.

\* Where *sources of evidence* (see second footnote) are compiled from, such as bibliographic databases, social media platforms, and Web sites.

† A more inclusive/heterogeneous term used to account for the different types of evidence or data sources (e.g., quantitative and/or qualitative research, expert opinion, and policy documents) that may be eligible in a scoping review as opposed to only studies. This is not to be confused with *information sources* (see first footnote).

‡ The frameworks by Arksey and O'Malley (6) and Levac and colleagues (7) and the JBI guidance (4, 5) refer to the process of data extraction in a scoping review as data charting.

§ The process of systematically examining research evidence to assess its validity, results, and relevance before using it to inform a decision. This term is used for items 12 and 19 instead of "risk of bias" (which is more applicable to systematic reviews of interventions) to include and acknowledge the various sources of evidence that may be used in a scoping review (e.g., quantitative and/or qualitative research, expert opinion, and policy document).

<sup>i</sup> Some of the items are not applicable (N/A) due to the fact this manuscript is a scoping review protocol.

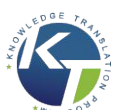

# BMJ Open

## Recovery-Oriented Social Work Practice in Mental Health and Addictions: A Scoping Review Protocol

|                                 |                                                                                                                                                                                                                                                                                                                                                                                                                                                                 |
|---------------------------------|-----------------------------------------------------------------------------------------------------------------------------------------------------------------------------------------------------------------------------------------------------------------------------------------------------------------------------------------------------------------------------------------------------------------------------------------------------------------|
| Journal:                        | <i>BMJ Open</i>                                                                                                                                                                                                                                                                                                                                                                                                                                                 |
| Manuscript ID                   | bmjopen-2020-037777.R1                                                                                                                                                                                                                                                                                                                                                                                                                                          |
| Article Type:                   | Protocol                                                                                                                                                                                                                                                                                                                                                                                                                                                        |
| Date Submitted by the Author:   | 19-May-2020                                                                                                                                                                                                                                                                                                                                                                                                                                                     |
| Complete List of Authors:       | Kourgiantakis, Toula ; University of Toronto, Factor-Inwentash Faculty of Social Work<br>Hussain, Amina; University of Toronto, Factor-Inwentash Faculty of Social Work<br>Ashcroft, Rachelle; University of Toronto,<br>Logan, Judith; University of Toronto, John P. Robarts Library<br>McNeil, Sandra; University of Toronto, Factor-Inwentash Faculty of Social Work<br>Williams, Charmaine; University of Toronto, Factor-Inwentash Faculty of Social Work |
| <b>Primary Subject Heading</b>: | Mental health                                                                                                                                                                                                                                                                                                                                                                                                                                                   |
| Secondary Subject Heading:      | Addiction                                                                                                                                                                                                                                                                                                                                                                                                                                                       |
| Keywords:                       | EDUCATION & TRAINING (see Medical Education & Training), Protocols & guidelines < HEALTH SERVICES ADMINISTRATION & MANAGEMENT, PSYCHIATRY, Substance misuse < PSYCHIATRY                                                                                                                                                                                                                                                                                        |
|                                 |                                                                                                                                                                                                                                                                                                                                                                                                                                                                 |

SCHOLARONE™  
Manuscripts

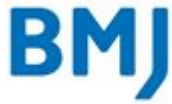

I, the Submitting Author has the right to grant and does grant on behalf of all authors of the Work (as defined in the below author licence), an exclusive licence and/or a non-exclusive licence for contributions from authors who are: i) UK Crown employees; ii) where BMJ has agreed a CC-BY licence shall apply, and/or iii) in accordance with the terms applicable for US Federal Government officers or employees acting as part of their official duties; on a worldwide, perpetual, irrevocable, royalty-free basis to BMJ Publishing Group Ltd ("BMJ") its licensees and where the relevant Journal is co-owned by BMJ to the co-owners of the Journal, to publish the Work in this journal and any other BMJ products and to exploit all rights, as set out in our [licence](#).

The Submitting Author accepts and understands that any supply made under these terms is made by BMJ to the Submitting Author unless you are acting as an employee on behalf of your employer or a postgraduate student of an affiliated institution which is paying any applicable article publishing charge ("APC") for Open Access articles. Where the Submitting Author wishes to make the Work available on an Open Access basis (and intends to pay the relevant APC), the terms of reuse of such Open Access shall be governed by a Creative Commons licence – details of these licences and which [Creative Commons](#) licence will apply to this Work are set out in our licence referred to above.

Other than as permitted in any relevant BMJ Author's Self Archiving Policies, I confirm this Work has not been accepted for publication elsewhere, is not being considered for publication elsewhere and does not duplicate material already published. I confirm all authors consent to publication of this Work and authorise the granting of this licence.

1  
2  
3  
4  
5  
6  
7  
8  
9 Recovery-Oriented Social Work Practice in Mental Health and Addictions:  
10 A Scoping Review Protocol  
11

12  
13 Toulou Kourgiantakis<sup>1</sup>

14  
15 Amina Hussain<sup>1</sup>

16  
17 Rachelle Ashcroft<sup>1</sup>

18  
19 Judith Logan<sup>2</sup>

20  
21 Sandra McNeil<sup>1</sup>

22  
23 Charmaine C. Williams<sup>1</sup>  
24  
25  
26  
27  
28  
29  
30  
31

32 <sup>1</sup> Factor-Inwentash Faculty of Social Work, University of Toronto, Toronto, ON, Canada

33  
34 <sup>2</sup> John P. Robarts Library, University of Toronto, Toronto, ON, Canada  
35  
36  
37  
38  
39  
40  
41  
42  
43  
44

45 Corresponding Author:  
46 Toulou Kourgiantakis, PhD, RSW, CCFT  
47 246 Bloor Street West  
48 Toronto, Ontario  
49 Canada M5S 1V4  
50 416-978-4176  
51 [toula.kourgiantakis@utoronto.ca](mailto:toula.kourgiantakis@utoronto.ca)  
52  
53

54  
55 Word count: 2,141  
56  
57  
58  
59  
60

## ABSTRACT

**Introduction:** Social work is a key profession in the field of mental health worldwide and the profession has values that are aligned with a recovery paradigm. However, there are gaps in understanding how social workers are applying the recovery paradigm in practice. This study will scope and synthesize the literature related to recovery and social work practice in mental health and addictions. There will also be an exploration of best practices and gaps in recovery-oriented social work practice. **Methods and analysis:** Using a scoping review framework developed by Arksey and O'Malley, we will conduct our search in five academic databases: PsycINFO, Medline, CINAHL Plus, Sociological Abstracts, and Social Services Abstracts. Articles meeting inclusion criteria will be charted to extract relevant themes and analysed using a qualitative thematic analysis approach. **Ethics and dissemination:** This review will provide relevant information about best practices and gaps in recovery-oriented social work practice in mental health and addictions. The study will inform the development of mental health curricula in social work programs and clinical settings. Results will be disseminated through a peer-reviewed journal and at conferences focusing on mental health, addictions, and social work education. Ethics approval is not required for this scoping review.

### Strengths and Limitations of this Study

- This is the first comprehensive review of the recovery paradigm and social work practice in mental health and addictions
- The search strategy has been developed by a research team with expertise in the methodology and subject area
- Due to the nature of the scoping review framework, the studies included in the review will not be appraised for quality
- This scoping review will include all article types and methodologies, but will not include books or grey literature

For peer review only

## Introduction

Recovery is a paradigm with increasing influence on mental health systems and policies in many high-income countries over the last two decades,[1-3] and it is included in the World Health Organization's (WHO) Mental Health Action Plan.[4] The recovery paradigm was introduced in the 1980s by mental health consumers [5] as an alternative to the biomedical model focusing on illness, chronicity, and cure.[6] We will use the term paradigm defined by Kuhn as a "constellation of beliefs, values, techniques, and so on shared by the members of a given community".[7 p.175] Members of a community share assumptions and beliefs, practice using a specific paradigm, and pursue common goals. Practice interventions and theories are developed and shaped by paradigms.[8,9] Recovery has been defined as "a way of living a satisfying, hopeful, and contributing life even with limitations caused by illness".[9 p.15] Researchers in the United Kingdom developed a CHIME framework to describe recovery-oriented processes that include connectedness, hope, identity, meaning, and empowerment. [10] Other countries have adopted common guiding principles for recovery that include CHIME concepts and other important processes related to recovery: 1) hope, 2) lived experiences, 3) individual, family, and community strengths, 4) self-determination, 5) peer support, 6) collaborative relationships, 7) a non-linear process, 8) a holistic approach, 9) cultural diversity, and 10) social inclusion, stigma, and discrimination.[11-13]

A similar movement towards a recovery framework has been adopted for addiction-related concerns which includes substance use and behavioural addictions. [11, 13, 14] While the services and approaches to treatment may be different for mental health concerns than they are for those coping with addictions, there are similar and overlapping principles of recovery. [11, 15] For some individuals coping with an addiction-related concern, the pathway to recovery may



1  
2  
3 involve abstinence, while for others it is about reducing the harm. [14] A term that is specific to  
4  
5  
6  
7  
8  
9  
10  
11  
12  
13  
14  
15  
16  
17  
18  
19  
20  
21  
22  
23  
24  
25  
26  
27  
28  
29  
30  
31  
32  
33  
34  
35  
36  
37  
38  
39  
40  
41  
42  
43  
44  
45  
46  
47  
48  
49  
50  
51  
52  
53  
54  
55  
56  
57  
58  
59  
60

involve abstinence, while for others it is about reducing the harm. [14] A term that is specific to addictions is recovery capital which refers to “the many resources one can use towards their recovery from alcohol and other drug dependency”. [16 p.349] Mental health and addiction services have a longstanding history of being divided in terms of policies and service provisions, but a review of recovery-oriented practice guidelines indicate that there are overlapping values and guiding principles related to recovery-oriented care and a “need for a unified vision of well-being.” [17 p.12]

Although many countries such as Canada have adopted a recovery framework for their national mental health and addiction strategy, researchers report challenges for mental health care professionals to implement recovery principles in practice and the culture of many systems of mental health care do not reflect a recovery paradigm.[2,3] The social work profession has a longstanding history of important and unique contributions in the field of mental health [18,19] and addictions. [20] The WHO identifies social work as a key profession in mental health across 149 countries. [4] An American survey found that social workers’ most common specialty practice area is mental health, and most social workers engage with individuals and families with mental health concerns even when working outside of this specific field. Irrespective of their practice domain, most social workers support clients with mental illness (96%), and addictions concerns (87%). [21] The recovery paradigm is strongly aligned with social work values and conceptual frameworks promoting empowerment, partnership, and choice informed by ecosystems theory and a strengths-based model.[6, 22, 23] Despite social work’s unique alignment with the recovery paradigm, researchers argue that social work has not had a strong voice in challenging and critiquing the dominant biomedical model.[23, 24] There are gaps in understanding the extent to which social workers are applying recovery guiding principles in

1  
2  
3 practice.[24,25] Researchers have identified several impediments to implementation, including  
4 the lack of a universal definition of recovery-oriented care and a paucity of evidence-based  
5 research to inform practice. [24-26] The organizational context may also influence  
6 implementation by pressuring social workers to adhere to institutional policies and procedures  
7 that may be incongruent with recovery principles.[24]  
8  
9

10  
11  
12  
13  
14  
15 Williams and colleagues [26] argue that recovery does not adequately address  
16 sociopolitical issues related to power and control over mental health care. Social work's core  
17 value of social justice can make valuable contributions to advancing how recovery is  
18 implemented in mental health care systems; however, social work has also been critiqued for its  
19 conformity with dominant structural systems that are not recovery-oriented and perpetuate  
20 stigma and discrimination.[26] Considering the important role of social workers internationally,  
21 we need a greater understanding of how social workers are conceptualizing and implementing  
22 recovery in mental health and addictions.[13] Moreover, research has shown that recovery-  
23 oriented practice is ambiguous and it is important for clinicians to learn to operationalize this  
24 concept and guidelines are needed that are context-specific. [27] There is a lack of guidelines for  
25 clinical application of recovery-oriented care and attempts to operationalize this have been  
26 through the lens of organizational priorities.[28]  
27  
28  
29  
30  
31  
32  
33  
34  
35  
36  
37  
38  
39  
40  
41

42 This paper delineates a protocol for a scoping review on the recovery paradigm in social  
43 work in mental health and addictions. The objectives of this review are to (1) scope the literature  
44 related to the recovery paradigm in social work in mental health and addictions, (2) synthesize  
45 definitions, principles, and values related to recovery-oriented social work practice in mental and  
46 addictions, (3) describe how recovery is implemented in social work practice, and (4) identify  
47  
48  
49  
50  
51  
52  
53  
54  
55  
56  
57  
58  
59  
60

1  
2  
3 evidence-based practices and gaps in recovery-oriented social work practice in mental health and  
4  
5 addictions.  
6

## 7 8 **METHODS AND ANALYSIS** 9

10 A scoping review will be conducted to map existing literature on recovery-oriented  
11  
12 practice within social work education, research, and practice in mental health and addictions.  
13

14 Scoping reviews involve systematically mapping recurring themes, concepts, and identifying  
15  
16 recommendations from the current literature as they relate to the research question at hand.[29]  
17

18 This study will employ the scoping review framework espoused by Arksey and O'Malley [30]  
19  
20 which consists of five stages: 1) identifying the research question; 2) identifying relevant studies;  
21  
22 3) study selection; 4) charting the data; and 5) collating, summarizing and reporting the results.  
23  
24

25 Given the nature of this exploratory study, this form of knowledge synthesis will be valuable in  
26  
27 providing a breadth of literature pertaining to the recovery paradigm within social work  
28  
29 education, research, and practice. We will adhere to the PRISMA Extension for Scoping  
30  
31 Reviews (PRISMA-ScR) reporting guidelines. [31] See Appendix A for the PRISMA-ScR  
32  
33 checklist.  
34  
35  
36

### 37 38 **Stage 1: identifying the research questions** 39

40 As highlighted throughout our literature review, recovery is central to social work  
41  
42 practice and there have been no studies charting the evidence on the recovery paradigm in social  
43  
44 work education, research and practice in mental health and addictions. Based on  
45  
46 recommendations by Colquhoun, Levac, O'Brien, et al.[32] the research questions for this  
47  
48 scoping review were developed collaboratively by our research team consisting of three social  
49  
50 work faculty members (TK, RA, CCW), one social sciences librarian (JL), and two social work  
51  
52 doctoral students (AH, SM).  
53  
54  
55  
56  
57  
58  
59  
60

1  
2  
3 The research team developed the following research questions: 1) How is the recovery-  
4 paradigm conceptualized and defined in social work practice in mental health and addictions? 2)  
5 What are the principles and values of recovery in social work? 3) How is the recovery paradigm  
6 used in social work practice, education, and research? 4) What are the gaps, challenges, or  
7 barriers of recovery in social work? 5) What are the recommendations, evidence-based or best  
8 practices for using a recovery paradigm in social work research, education, and practice?  
9  
10  
11  
12  
13  
14  
15  
16

### 17 **Stage 2: identifying relevant studies**

18  
19 The initial search strategy was developed in PsycINFO (Ovid, 1806-) by the social  
20 sciences librarian (JL) in consultation with other team members. See Table 1 for the draft search  
21 strategy in PsycINFO. It will be sent to a second librarian for peer review, using the Peer Review  
22 of Electronic Search Strategies (PRESS) framework.[33] Any subsequent feedback will be  
23 incorporated to enhance the breadth and scope of articles generated from the search. Our search  
24 strategy will be conducted in five academic databases: PsycINFO (1806-), Medline (1946 -),  
25 CINAHL Plus (1937-), Sociological Abstracts (1952-), and Social Services Abstracts (1979-).  
26 These databases were intentionally selected for their inclusion of mental health literature, as well  
27 as research on social work practice and education, and thus are likely to capture relevant  
28 scholarly material. Furthermore, we will conduct a citation search of the reference lists of  
29 selected articles to ensure a wider scope of articles are included.  
30  
31  
32  
33  
34  
35  
36  
37  
38  
39  
40  
41  
42  
43  
44  
45  
46  
47  
48  
49  
50  
51  
52  
53  
54  
55  
56  
57  
58  
59  
60

**Table 1: Search Strategy for Ovid PsycINFO (1806-)**

| #  | Searches                                                                                                                                                                                                                              |
|----|---------------------------------------------------------------------------------------------------------------------------------------------------------------------------------------------------------------------------------------|
| 1  | social work*.tw.                                                                                                                                                                                                                      |
| 2  | casework*.tw.                                                                                                                                                                                                                         |
| 3  | case work*.tw.                                                                                                                                                                                                                        |
| 4  | social workers/                                                                                                                                                                                                                       |
| 5  | psychiatric social workers/                                                                                                                                                                                                           |
| 6  | Social case work/                                                                                                                                                                                                                     |
| 7  | or/1-6 [social work]                                                                                                                                                                                                                  |
| 8  | (recover* adj3 (care or practic* or educat* or curricul* or teach* or learn* or train* or research* or therap* or support* or orient* or approach* or model? or health or mental health or institutional or capital or natural*)).tw. |
| 9  | "recovery (disorders)"/                                                                                                                                                                                                               |
| 10 | exp Rehabilitation/                                                                                                                                                                                                                   |
| 11 | recover*.tw.                                                                                                                                                                                                                          |
| 12 | 10 and 11                                                                                                                                                                                                                             |
| 13 | 8 or 9 or 12                                                                                                                                                                                                                          |
| 14 | 7 and 13                                                                                                                                                                                                                              |

**Stage 3: study selection**

After generating a list of articles from our search strategy we will engage in an iterative, peer review two-stage screening process with two independent reviewers at each stage. In the first

1  
2  
3 stage, two independent reviewers will screen articles for suitability based on their title and  
4  
5 abstracts. In the second stage, the reviewers will independently conduct a full text review of the  
6  
7 selected articles to ensure their content meets our inclusion criteria outlined below. If there is  
8  
9 ambiguity on whether certain articles fit the scope of this protocol, a third reviewer will be  
10  
11 consulted. We will use Covidence – a web-based software for systematic and scoping reviews  
12  
13 that facilitates screening, study selection, and data extraction.[34] This protocol will focus on  
14  
15 articles written in English only, and selected material will include empirical studies, literature  
16  
17 reviews, dissertations, teaching articles, and conceptual/theoretical papers. There are no outlined  
18  
19 geographical or date restrictions. Articles must meet the following inclusion criteria to be  
20  
21 selected: (1) include the term recovery in the title or abstract, (2) use the term social work or  
22  
23 social worker in the title or abstract, (3) have an explicit focus on recovery which may include  
24  
25 different concepts such as recovery, recovery model, recovery-oriented practice, recovery-  
26  
27 oriented care etc., (4) explicitly focus on social work research, education, training, or practice in  
28  
29 relationship to recovery, and (5) focus on recovery with respect to mental health and/or  
30  
31 addictions. We will exclude books, book reviews, editorials, and gray literature.  
32  
33  
34  
35  
36  
37

#### 38 **Stage 4: charting the data**

39  
40 Key themes extracted from the selected articles will be categorized, summarized, and presented  
41  
42 clearly within a data charting form. The research team developed initial charting variables based  
43  
44 on the research questions and these variables will be used to extract data and identify key themes  
45  
46 from selected articles. The preliminary variables that will be used to categorize information  
47  
48 include (1) authors, (2) year, (3) country where study was conducted or country of first author's  
49  
50 affiliation, (4) journal, (5) format of paper (empirical, literature review, dissertation,  
51  
52 conceptual/theoretical, editorial, teaching article, etc.), (6) definition of recovery, (7) principles  
53  
54  
55  
56  
57  
58  
59  
60

1  
2  
3 of recovery, (8) area of focus (e.g. mental health, addictions, etc.), (9) implementation of  
4 recovery (10) targeted audience (e.g. students, service users, social workers etc.), (11) focus on  
5 equity or access, (12) focus on stigma, (13) focus on race, culture, and/or diversity (14) gaps,  
6 challenges or barriers, and (15) recommendations, evidence-based or best practices. To assess  
7 whether these headings accurately capture the scope and breadth of the content, the reviewers  
8 will have two research assistants independently chart the first five articles that meet our inclusion  
9 criteria and if necessary, refine the definitions for the variables/charting categories. We will also  
10 engage in a constant comparative method and peer review to minimize any discrepancies during  
11 the charting process. The researchers will also engage in a qualitative thematic analysis to  
12 identify and highlight themes present amongst this chart. The charted data will be organized and  
13 presented in a Microsoft Excel spreadsheet.

### 24 **Stage 5: identification, synthesis, and report of study findings**

25 Findings outlined in the charted data will be reviewed, synthesized, and analyzed through a  
26 numerical summary analysis, as well as a qualitative thematic analysis. The final scoping review  
27 will be presented in publications and at upcoming conferences. Study findings will be  
28 disseminated to relevant stakeholders, such as researchers, clinicians, and social work educators.  
29 Anticipated findings are expected to map out the current nature and scope of recovery in social  
30 work practice in mental health and addictions, and the scoping review will provide  
31 recommendations for recovery-oriented social work practice in mental health and addictions.

### 32 **Patients and public involvement**

33 No patients nor members of the public were involved in this project.

## ETHICS AND DISSEMINATION

The scoping review outlined in this paper contributes to our current understanding and will advance knowledge of recovery-oriented social work practice in mental health and addictions.

The information gathered for this paper and the outlined scoping review were retrieved from publicly available sources, therefore ethics approval is not required for this project. The results will be disseminated through a peer-reviewed journal and reported at national and international conferences on mental health and addictions, as well as social work education, practice, and research.

**Contributions of authors:** All authors made substantive intellectual contributions to the development of this protocol. TK and AH developed, wrote, and edited the initial protocol. JL developed the search strategy and contributed to the writing of the protocol. All authors (TK, AH, JL, RA, CCW) critically reviewed and revised the final version prior to submission.

**Funding:** This scoping review protocol is supported by a 2019-2020 Royal Bank of Canada Graduate Fellowship in Applied Social Work Research, Factor-Inwentash Faculty of Social Work, University of Toronto.

**Competing interests:** None declared.

**Data sharing statement:** The dataset is available by contacting the corresponding author.



## References

1. Adams N, Daniels A, Compagni A. International pathways to mental health transformation. *Int J Ment Health* 2009;38(1):30-45.
2. Kidd SA, McKenzie KJ, Virdee G. Mental health reform at a systems level: widening the lens on recovery-oriented care. *Can J Psychiatry* 2014;59(5):243-9.
3. Piat M, Sabetti J. The development of a recovery-oriented mental health system in Canada: what the experience of commonwealth countries tells us. *Can J Commun Ment Health* 2009;28(2):17-33.
4. WHO. *Mental health action plan 2013-2020*. Geneva: World Health Organization, 2013.
5. Deegan PE. Recovery: The lived experience of rehabilitation. *Psychosocial rehabilitation journal* 1988;11(4):11.
6. Carpenter J. Mental health recovery paradigm: Implications for social work. *Health Soc Work* 2002;27(2):86-94.
7. Kuhn TS. *The structure of scientific revolutions*. University of Chicago press; 2012 Apr 18.
8. Ashcroft R, Van Katwyk T, Hogarth K. An examination of the holism paradigm: A view of social work. *Social work in public health. Soc Work Public Health* 2017;32(8):461-74.
9. Anthony WA. Recovery from mental illness: the guiding vision of the mental health service system in the 1990s. *J Psychosoc Rehabil* 1993;16(4):11.
10. Leamy M, Bird V, Le Boutillier C, Williams J, Slade M. Conceptual framework for personal recovery in mental health: systematic review and narrative synthesis. *Br J Psychiatry* 2011 Dec;199(6):445-52.
11. Mental Health Commission of Canada. *Guidelines for recovery-oriented practice*. Ottawa: Mental Health Commission of Canada; 2015.
12. Commonwealth of Australia. *A national framework for recovery-oriented mental health services: policy and theory*.
13. Substance Abuse and Mental Health Services Administration (SAMHSA). *SAMHSA'S working definition of recovery: 10 guiding principles of recovery*. Department of Health and Human Services; 2012. 1-7.
14. Canadian Centre on Substance Use and Addiction. *Moving Toward a Recovery-Oriented System of Care: A Resource for Service Providers and Decision Makers*, 2017. [internet] Ottawa: Canadian Centre on Substance Use and Addiction; 2017. Available from: <https://www.ccsa.ca/sites/default/files/2019-04/CCSA-Recovery-Oriented-System-of-Care-Resource-2017-en.pdf>
15. Davidson G, Brophy L, Campbell J. Risk, recovery and capacity: Competing or complementary approaches to mental health social work. *Aust Soc Work* 2016 Apr 2;69(2):158-68.

16. Hennessy EA. Recovery capital: A systematic review of the literature. *Addict Res Theory* 2017 Sep 3;25(5):349-60.
17. Bartram M. 'It's Really About Wellbeing': a Canadian Investigation of Harm Reduction as a Bridge Between Mental Health and Addiction Recovery. *Int J Ment Health Addict* 2020 Feb 20:1-4.
18. Ashcroft R, Van Katwyk T. Joining the global conversation: Social workers define health using a participatory action research approach. *Br J Soc Work* 2017;47(2):579-96.
19. Ashcroft R, Kourgiantakis T, Fearing G, Robertson T, Brown JB. Social work's scope of practice in primary mental health care: a scoping review. *Br J Soc Work* 2019;49(2):318-34.
20. Straussner SL. The role of social workers in the treatment of addictions: A brief history. *J Soc Work Pract Addict* 2001 Jan 1;1(1):3-9.
21. Whitaker T, Weismiller T, Clark E. *Assuring the sufficiency of a frontline workforce: A national study of licensed social workers*. Executive summary: 2006.
22. Davidson L, White W. The concept of recovery as an organizing principle for integrating mental health and addiction services. *J Behav Health Serv Res* 2007 Apr 1;34(2):109-20.
23. Hyde B, Bowles W, Pawar M. 'We're Still in There'—Consumer Voices on Mental Health Inpatient Care: Social Work Research Highlighting Lessons for Recovery Practice. *Br J Soc Work* 2015;45(suppl\_1): i62-i78.
24. Khoury E, Rodriguez del Barrio L. Recovery-oriented mental health practice: A social work perspective. *Br J Soc Work* 2015;45(suppl\_1): i27-44.
25. Loumpa V. Promoting recovery through peer support: Possibilities for social work practice. *Health Soc Work* 2012;51(1):53-65.
26. Williams CC, Almeida M, Knyahnytska Y. Towards a biopsychosociopolitical frame for recovery in the context of mental illness. *Br J Soc Work* 2015;45(suppl\_1): i9-i26.
27. Le Boutillier C, Leamy M, Bird VJ, Davidson L, Williams J, Slade M. What does recovery mean in practice? A qualitative analysis of international recovery-oriented practice guidance. *Psychiatr. Serv* 2011 Dec;62(12):1470-6.
28. Le Boutillier C, Chevalier A, Lawrence V, Leamy M, Bird VJ, Macpherson R, Williams J, Slade M. Staff understanding of recovery-orientated mental health practice: a systematic review and narrative synthesis. *Implement Sci* 2015 Dec 1;10(1):87.
29. Levac D, Colquhoun H, O'Brien KK. Scoping studies: advancing the methodology. *Implement Sci* 2010;5(1):69.
30. Arksey H, O'Malley L. Scoping studies: towards a methodological framework. *Int J Soc Res Methodol* 2005;8(1):19–32.
31. Tricco AC, Lillie E, Zarin W, O'Brien KK, Colquhoun H, Levac D, Moher D, Peters MD, Horsley T, Weeks L, Hempel S. PRISMA extension for scoping reviews (PRISMA-ScR): checklist and explanation. *Ann Intern Med* 2018;169(7):467-73.

- 1  
2  
3 32. Colquhoun HL, Levac D, O'Brien KK, Straus S, Tricco AC, Perrier L, Kastner M, Moher D.  
4 Scoping reviews: time for clarity in definition, methods, and reporting. *J Clin Epidemiol*  
5 2014;67(12):1291-4.  
6  
7 33. McGowan J, Sampson M, Salzwedel DM, Cogo E, Foerster V, Lefebvre C. PRESS peer  
8 review of electronic search strategies: 2015 guideline statement. *J Clin Epidemiol*  
9 2016;75:40-6.  
10  
11 34. Macdonald M, Misener RM, Weeks L, Helwig M. Covidence vs Excel for the title and  
12 abstract review stage of a systematic review. *Int J Evid Based Healthc* 2016 1;14(4):200-201.  
13  
14  
15  
16  
17  
18  
19  
20  
21  
22  
23  
24  
25  
26  
27  
28  
29  
30  
31  
32  
33  
34  
35  
36  
37  
38  
39  
40  
41  
42  
43  
44  
45  
46  
47  
48  
49  
50  
51  
52  
53  
54  
55  
56  
57  
58  
59  
60

## Appendix A - Preferred Reporting Items for Systematic reviews and Meta-Analyses extension for Scoping Reviews (PRISMA-ScR) Checklist<sup>i</sup>

| SECTION                                               | ITEM | PRISMA-ScR CHECKLIST ITEM                                                                                                                                                                                                                                                                                  | REPORTED ON PAGE #                    |
|-------------------------------------------------------|------|------------------------------------------------------------------------------------------------------------------------------------------------------------------------------------------------------------------------------------------------------------------------------------------------------------|---------------------------------------|
| <b>TITLE</b>                                          |      |                                                                                                                                                                                                                                                                                                            |                                       |
| Title                                                 | 1    | Identify the report as a scoping review.                                                                                                                                                                                                                                                                   | 1                                     |
| <b>ABSTRACT</b>                                       |      |                                                                                                                                                                                                                                                                                                            |                                       |
| Structured summary                                    | 2    | Provide a structured summary that includes (as applicable): background, objectives, eligibility criteria, sources of evidence, charting methods, results, and conclusions that relate to the review questions and objectives.                                                                              | 2                                     |
| <b>INTRODUCTION</b>                                   |      |                                                                                                                                                                                                                                                                                                            |                                       |
| Rationale                                             | 3    | Describe the rationale for the review in the context of what is already known. Explain why the review questions/objectives lend themselves to a scoping review approach.                                                                                                                                   | 4-6                                   |
| Objectives                                            | 4    | Provide an explicit statement of the questions and objectives being addressed with reference to their key elements (e.g., population or participants, concepts, and context) or other relevant key elements used to conceptualize the review questions and/or objectives.                                  | 6-7                                   |
| <b>METHODS</b>                                        |      |                                                                                                                                                                                                                                                                                                            |                                       |
| Protocol and registration                             | 5    | Indicate whether a review protocol exists; state if and where it can be accessed (e.g., a Web address); and if available, provide registration information, including the registration number.                                                                                                             | Protocol in BMJ Open                  |
| Eligibility criteria                                  | 6    | Specify characteristics of the sources of evidence used as eligibility criteria (e.g., years considered, language, and publication status), and provide a rationale.                                                                                                                                       | 10                                    |
| Information sources*                                  | 7    | Describe all information sources in the search (e.g., databases with dates of coverage and contact with authors to identify additional sources), as well as the date the most recent search was executed.                                                                                                  | 8 for sources (date N/A for protocol) |
| Search                                                | 8    | Present the full electronic search strategy for at least 1 database, including any limits used, such that it could be repeated.                                                                                                                                                                            | 9                                     |
| Selection of sources of evidence†                     | 9    | State the process for selecting sources of evidence (i.e., screening and eligibility) included in the scoping review.                                                                                                                                                                                      | 10                                    |
| Data charting process‡                                | 10   | Describe the methods of charting data from the included sources of evidence (e.g., calibrated forms or forms that have been tested by the team before their use, and whether data charting was done independently or in duplicate) and any processes for obtaining and confirming data from investigators. | 10-11                                 |
| Data items                                            | 11   | List and define all variables for which data were sought and any assumptions and simplifications made.                                                                                                                                                                                                     | Preliminary variables on 9-10-11      |
| Critical appraisal of individual sources of evidence§ | 12   | If done, provide a rationale for conducting a critical appraisal of included sources of evidence; describe                                                                                                                                                                                                 | N/A                                   |

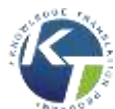

| SECTION                                       | ITEM | PRISMA-ScR CHECKLIST ITEM                                                                                                                                                                       | REPORTED ON PAGE # |
|-----------------------------------------------|------|-------------------------------------------------------------------------------------------------------------------------------------------------------------------------------------------------|--------------------|
|                                               |      | the methods used and how this information was used in any data synthesis (if appropriate).                                                                                                      |                    |
| Synthesis of results                          | 13   | Describe the methods of handling and summarizing the data that were charted.                                                                                                                    | 11                 |
| <b>RESULTS</b>                                |      |                                                                                                                                                                                                 |                    |
| Selection of sources of evidence              | 14   | Give numbers of sources of evidence screened, assessed for eligibility, and included in the review, with reasons for exclusions at each stage, ideally using a flow diagram.                    | N/A                |
| Characteristics of sources of evidence        | 15   | For each source of evidence, present characteristics for which data were charted and provide the citations.                                                                                     | N/A                |
| Critical appraisal within sources of evidence | 16   | If done, present data on critical appraisal of included sources of evidence (see item 12).                                                                                                      | N/A                |
| Results of individual sources of evidence     | 17   | For each included source of evidence, present the relevant data that were charted that relate to the review questions and objectives.                                                           | N/A                |
| Synthesis of results                          | 18   | Summarize and/or present the charting results as they relate to the review questions and objectives.                                                                                            | N/A                |
| <b>DISCUSSION</b>                             |      |                                                                                                                                                                                                 |                    |
| Summary of evidence                           | 19   | Summarize the main results (including an overview of concepts, themes, and types of evidence available), link to the review questions and objectives, and consider the relevance to key groups. | N/A                |
| Limitations                                   | 20   | Discuss the limitations of the scoping review process.                                                                                                                                          | 3 for protocol     |
| Conclusions                                   | 21   | Provide a general interpretation of the results with respect to the review questions and objectives, as well as potential implications and/or next steps.                                       | N/A                |
| <b>FUNDING</b>                                |      |                                                                                                                                                                                                 |                    |
| Funding                                       | 22   | Describe sources of funding for the included sources of evidence, as well as sources of funding for the scoping review. Describe the role of the funders of the scoping review.                 | 12                 |

JBI = Joanna Briggs Institute; PRISMA-ScR = Preferred Reporting Items for Systematic reviews and Meta-Analyses extension for Scoping Reviews.

\* Where *sources of evidence* (see second footnote) are compiled from, such as bibliographic databases, social media platforms, and Web sites.

† A more inclusive/heterogeneous term used to account for the different types of evidence or data sources (e.g., quantitative and/or qualitative research, expert opinion, and policy documents) that may be eligible in a scoping review as opposed to only studies. This is not to be confused with *information sources* (see first footnote).

‡ The frameworks by Arksey and O'Malley (6) and Levac and colleagues (7) and the JBI guidance (4, 5) refer to the process of data extraction in a scoping review as data charting.

§ The process of systematically examining research evidence to assess its validity, results, and relevance before using it to inform a decision. This term is used for items 12 and 19 instead of "risk of bias" (which is more applicable to systematic reviews of interventions) to include and acknowledge the various sources of evidence that may be used in a scoping review (e.g., quantitative and/or qualitative research, expert opinion, and policy document).

<sup>i</sup> Some of the items are not applicable (N/A) due to the fact this manuscript is a scoping review protocol.

# BMJ Open

## Recovery-Oriented Social Work Practice in Mental Health and Addictions: A Scoping Review Protocol

|                                 |                                                                                                                                                                                                                                                                                                                                                                                                                                                                |
|---------------------------------|----------------------------------------------------------------------------------------------------------------------------------------------------------------------------------------------------------------------------------------------------------------------------------------------------------------------------------------------------------------------------------------------------------------------------------------------------------------|
| Journal:                        | <i>BMJ Open</i>                                                                                                                                                                                                                                                                                                                                                                                                                                                |
| Manuscript ID                   | bmjopen-2020-037777.R2                                                                                                                                                                                                                                                                                                                                                                                                                                         |
| Article Type:                   | Protocol                                                                                                                                                                                                                                                                                                                                                                                                                                                       |
| Date Submitted by the Author:   | 15-Jul-2020                                                                                                                                                                                                                                                                                                                                                                                                                                                    |
| Complete List of Authors:       | Kourgiantakis, Toula ; University of Toronto, Factor-Inwentash Faculty of Social Work<br>Hussain, Amina; University of Toronto, Factor-Inwentash Faculty of Social Work<br>Ashcroft, Rachele; University of Toronto,<br>Logan, Judith; University of Toronto, John P. Robarts Library<br>McNeil, Sandra; University of Toronto, Factor-Inwentash Faculty of Social Work<br>Williams, Charmaine; University of Toronto, Factor-Inwentash Faculty of Social Work |
| <b>Primary Subject Heading</b>: | Mental health                                                                                                                                                                                                                                                                                                                                                                                                                                                  |
| Secondary Subject Heading:      | Addiction                                                                                                                                                                                                                                                                                                                                                                                                                                                      |
| Keywords:                       | EDUCATION & TRAINING (see Medical Education & Training), Protocols & guidelines < HEALTH SERVICES ADMINISTRATION & MANAGEMENT, PSYCHIATRY, Substance misuse < PSYCHIATRY                                                                                                                                                                                                                                                                                       |
|                                 |                                                                                                                                                                                                                                                                                                                                                                                                                                                                |

SCHOLARONE™  
Manuscripts

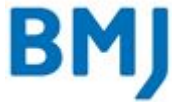

I, the Submitting Author has the right to grant and does grant on behalf of all authors of the Work (as defined in the below author licence), an exclusive licence and/or a non-exclusive licence for contributions from authors who are: i) UK Crown employees; ii) where BMJ has agreed a CC-BY licence shall apply, and/or iii) in accordance with the terms applicable for US Federal Government officers or employees acting as part of their official duties; on a worldwide, perpetual, irrevocable, royalty-free basis to BMJ Publishing Group Ltd ("BMJ") its licensees and where the relevant Journal is co-owned by BMJ to the co-owners of the Journal, to publish the Work in this journal and any other BMJ products and to exploit all rights, as set out in our [licence](#).

The Submitting Author accepts and understands that any supply made under these terms is made by BMJ to the Submitting Author unless you are acting as an employee on behalf of your employer or a postgraduate student of an affiliated institution which is paying any applicable article publishing charge ("APC") for Open Access articles. Where the Submitting Author wishes to make the Work available on an Open Access basis (and intends to pay the relevant APC), the terms of reuse of such Open Access shall be governed by a Creative Commons licence – details of these licences and which [Creative Commons](#) licence will apply to this Work are set out in our licence referred to above.

Other than as permitted in any relevant BMJ Author's Self Archiving Policies, I confirm this Work has not been accepted for publication elsewhere, is not being considered for publication elsewhere and does not duplicate material already published. I confirm all authors consent to publication of this Work and authorise the granting of this licence.

1  
2  
3  
4  
5  
6  
7  
8  
9 Recovery-Oriented Social Work Practice in Mental Health and Addictions:  
10 A Scoping Review Protocol  
11

12  
13 Toulou Kourgiantakis<sup>1</sup>

14  
15 Amina Hussain<sup>1</sup>

16  
17 Rachelle Ashcroft<sup>1</sup>

18  
19 Judith Logan<sup>2</sup>

20  
21 Sandra McNeil<sup>1</sup>

22  
23 Charmaine C. Williams<sup>1</sup>  
24  
25  
26  
27  
28  
29  
30  
31

32 <sup>1</sup> Factor-Inwentash Faculty of Social Work, University of Toronto, Toronto, ON, Canada

33  
34 <sup>2</sup> John P. Robarts Library, University of Toronto, Toronto, ON, Canada  
35  
36  
37  
38  
39  
40  
41  
42  
43  
44

45 Corresponding Author:  
46 Toulou Kourgiantakis, PhD, RSW, CCFT  
47 246 Bloor Street West  
48 Toronto, Ontario  
49 Canada M5S 1V4  
50 416-978-4176  
51 [toula.kourgiantakis@utoronto.ca](mailto:toula.kourgiantakis@utoronto.ca)  
52  
53

54  
55 Word count: 2,239  
56  
57  
58  
59  
60



## ABSTRACT

**Introduction:** Social work is a key profession in the field of mental health worldwide and the profession has values that are aligned with a recovery paradigm. However, there are gaps in understanding how social workers are applying the recovery paradigm in practice. This study will scope and synthesize the literature related to recovery and social work practice in mental health and addictions. There will also be an exploration of best practices and gaps in recovery-oriented social work practice. **Methods and analysis:** Using a scoping review framework developed by Arksey and O'Malley, we will conduct our search in five academic databases: PsycINFO, Medline, CINAHL Plus, Sociological Abstracts, and Social Services Abstracts. Articles meeting inclusion criteria will be charted to extract relevant themes and analysed using a qualitative thematic analysis approach. **Ethics and dissemination:** This review will provide relevant information about best practices and gaps in recovery-oriented social work practice in mental health and addictions. The study will inform the development of mental health curricula in social work programs and clinical settings. Results will be disseminated through a peer-reviewed journal and at conferences focusing on mental health, addictions, and social work education. Ethics approval is not required for this scoping review.

### Strengths and Limitations of this Study

- This is the first comprehensive review of the recovery paradigm and social work practice in mental health and addictions
- The search strategy has been developed by a research team with expertise in the methodology and subject area
- Due to the nature of the scoping review framework, the studies included in the review will not be appraised for quality
- This scoping review will include all article types and methodologies, but will not include books or grey literature

For peer review only

## Introduction

Recovery is a paradigm with increasing influence on mental health systems and policies in many high-income countries over the last two decades,[1-3] and it is included in the World Health Organization's (WHO) Mental Health Action Plan.[4] The recovery paradigm was introduced in the 1980s by mental health consumers [5] as an alternative to the biomedical model focusing on illness, chronicity, and cure.[6] We will use the term paradigm defined by Kuhn as a "constellation of beliefs, values, techniques, and so on shared by the members of a given community".[7 p.175] Members of a community share assumptions and beliefs, practice using a specific paradigm, and pursue common goals. Practice interventions and theories are developed and shaped by paradigms.[8,9] Recovery has been defined as "a way of living a satisfying, hopeful, and contributing life even with limitations caused by illness".[9 p.15] Researchers in the United Kingdom developed a CHIME framework to describe recovery-oriented processes that include connectedness, hope, identity, meaning, and empowerment. [10] Other countries have adopted common guiding principles for recovery that include CHIME concepts and other important processes related to recovery: 1) hope, 2) lived experiences, 3) individual, family, and community strengths, 4) self-determination, 5) peer support, 6) collaborative relationships, 7) a non-linear process, 8) a holistic approach, 9) cultural diversity, and 10) social inclusion, stigma, and discrimination.[11-13]

A similar movement towards a recovery framework has been adopted for addiction-related concerns which includes substance use and behavioural addictions. [11, 13, 14] While the services and approaches to treatment may be different for mental health concerns than they are for those coping with addictions, there are similar and overlapping principles of recovery. [11, 15] For some individuals coping with an addiction-related concern, the pathway to recovery may

1  
2  
3 involve abstinence, while for others it is about reducing the harm. [14] A term that is specific to  
4  
5  
6  
7  
8  
9  
10  
11  
12  
13  
14  
15  
16  
17  
18  
19  
20  
21  
22  
23  
24  
25  
26  
27  
28  
29  
30  
31  
32  
33  
34  
35  
36  
37  
38  
39  
40  
41  
42  
43  
44  
45  
46  
47  
48  
49  
50  
51  
52  
53  
54  
55  
56  
57  
58  
59  
60

involve abstinence, while for others it is about reducing the harm. [14] A term that is specific to  
addictions is recovery capital which refers to “the many resources one can use towards their  
recovery from alcohol and other drug dependency”. [16 p.349] Mental health and addiction  
services have a longstanding history of being divided in terms of policies and service provisions,  
but a review of recovery-oriented practice guidelines indicate that there are overlapping values  
and guiding principles related to recovery-oriented care and a “need for a unified vision of well-  
being.” [17 p.12]

Although many countries such as Canada have adopted a recovery framework for their  
national mental health strategy, researchers report challenges for mental health care professionals  
to implement recovery principles in practice and the culture of many systems of mental health  
care do not reflect a recovery paradigm.[2,3] The social work profession has a longstanding  
history of important and unique contributions in the field of mental health [18,19] and addictions.  
[20] The WHO identifies social work as a key profession in mental health across 149 countries.  
[4] An American survey found that social workers’ most common specialty practice area is  
mental health, and most social workers engage with individuals and families with mental health  
concerns even when working outside of this specific field. Irrespective of their practice domain,  
most social workers support clients with mental illness (96%), and addictions concerns (87%).  
[21] The recovery paradigm is strongly aligned with social work values and conceptual  
frameworks promoting empowerment, partnership, and choice informed by ecosystems theory  
and a strengths-based model.[6, 22, 23] Despite social work’s unique alignment with the  
recovery paradigm, researchers argue that social work has not had a strong voice in challenging  
and critiquing the dominant biomedical model.[23, 24] There are gaps in understanding the  
extent to which social workers are applying recovery guiding principles in practice.[24,25]

1  
2  
3 Researchers have identified several impediments to implementation, including the lack of a  
4 universal definition of recovery-oriented care and a paucity of evidence-based research to inform  
5 practice. [24-26] The organizational context may also influence implementation by pressuring  
6 social workers to adhere to institutional policies and procedures that may be incongruent with  
7 recovery principles.[24]  
8  
9

10  
11  
12  
13  
14  
15 Williams and colleagues [26] argue that recovery does not adequately address  
16 sociopolitical issues related to power and control over mental health care. Social work's core  
17 value of social justice can make valuable contributions to advancing how recovery is  
18 implemented in mental health care systems; however, social work has also been critiqued for its  
19 conformity with dominant structural systems that are not recovery-oriented and perpetuate  
20 stigma and discrimination.[26] Considering the important role of social workers internationally,  
21 we need a greater understanding of how social workers are conceptualizing and implementing  
22 recovery in mental health and addictions.[13] Moreover, research has shown that recovery-  
23 oriented practice is ambiguous and it is important for clinicians to learn to operationalize this  
24 concept and guidelines are needed that are context-specific. [27] There is a lack of guidelines for  
25 clinical application of recovery-oriented care and attempts to operationalize this have been  
26 through the lens of organizational priorities.[28]  
27  
28  
29  
30  
31  
32  
33  
34  
35  
36  
37  
38  
39  
40  
41

42 This paper delineates a protocol for a scoping review on the recovery paradigm in social  
43 work in mental health and addictions. The objectives of this review are to (1) scope the literature  
44 related to the recovery paradigm in social work in mental health and addictions, (2) synthesize  
45 definitions, principles, and values related to recovery-oriented social work practice in mental and  
46 addictions, (3) describe how recovery is implemented in social work practice, and (4) identify  
47  
48  
49  
50  
51  
52  
53  
54  
55  
56  
57  
58  
59  
60

1  
2  
3 evidence-based practices and gaps in recovery-oriented social work practice in mental health and  
4  
5 addictions.  
6

## 7 8 **METHODS AND ANALYSIS** 9

10 A scoping review will be conducted to map existing literature on recovery-oriented  
11  
12 practice within social work education, research, and practice in mental health and addictions.  
13

14 Scoping reviews involve systematically mapping recurring themes, concepts, and identifying  
15  
16 recommendations from the current literature as they relate to the research question at hand.[29]  
17

18 This study will employ the scoping review framework espoused by Arksey and O'Malley [30]  
19  
20 which consists of five stages: 1) identifying the research question; 2) identifying relevant studies;  
21  
22 3) study selection; 4) charting the data; and 5) collating, summarizing and reporting the results.  
23  
24

25 Given the nature of this exploratory study, this form of knowledge synthesis will be valuable in  
26  
27 providing a breadth of literature pertaining to the recovery paradigm within social work  
28  
29 education, research, and practice. We will adhere to the PRISMA Extension for Scoping  
30  
31 Reviews (PRISMA-ScR) reporting guidelines. [31] See Appendix A for the PRISMA-ScR  
32  
33 checklist.  
34  
35  
36

### 37 **Stage 1: identifying the research questions** 38

39 As highlighted throughout our literature review, recovery is central to social work  
40  
41 practice and there have been no studies charting the evidence on the recovery paradigm in social  
42  
43 work education, research and practice in mental health and addictions. Based on  
44  
45 recommendations by Colquhoun, Levac, O'Brien, et al.[32] the research questions for this  
46  
47 scoping review were developed collaboratively by our research team consisting of three social  
48  
49 work faculty members (TK, RA, CCW), one social sciences librarian (JL), and two social work  
50  
51 doctoral students (AH, SM).  
52  
53  
54  
55  
56  
57  
58  
59  
60

1  
2  
3 The research team developed the following research questions: 1) How is the recovery-  
4 paradigm conceptualized and defined in social work practice in mental health and addictions? 2)  
5 What are the principles and values of recovery in social work? 3) How is the recovery paradigm  
6 used in social work practice, education, and research? 4) What are the gaps, challenges, or  
7 barriers of recovery in social work? 5) What are the recommendations, evidence-based or best  
8 practices for using a recovery paradigm in social work research, education, and practice?  
9  
10  
11  
12  
13  
14  
15  
16

### 17 **Stage 2: identifying relevant studies**

18  
19 The initial search strategy was developed in PsycINFO (Ovid, 1806-) by the social  
20 sciences librarian (JL) in consultation with other team members. See Table 1 for the draft search  
21 strategy in PsycINFO. It will be sent to a second librarian for peer review, using the Peer Review  
22 of Electronic Search Strategies (PRESS) framework.[33] Any subsequent feedback will be  
23 incorporated to enhance the breadth and scope of articles generated from the search. Our search  
24 strategy will be conducted in five academic databases: PsycINFO (1806-), Medline (1946 -),  
25 CINAHL Plus (1937-), Sociological Abstracts (1952-), and Social Services Abstracts (1979-).  
26 These databases were intentionally selected for their inclusion of mental health literature, as well  
27 as research on social work practice and education, and thus are likely to capture relevant  
28 scholarly material. Furthermore, we will conduct a citation search of the reference lists of  
29 selected articles to ensure a wider scope of articles are included.  
30  
31  
32  
33  
34  
35  
36  
37  
38  
39  
40  
41  
42  
43  
44  
45  
46  
47  
48  
49  
50  
51  
52  
53  
54  
55  
56  
57  
58  
59  
60

**Table 1: Search Strategy for Ovid PsycINFO (1806-)**

| #  | Searches                                                                                                                                                                                                                              |
|----|---------------------------------------------------------------------------------------------------------------------------------------------------------------------------------------------------------------------------------------|
| 1  | social work*.tw.                                                                                                                                                                                                                      |
| 2  | casework*.tw.                                                                                                                                                                                                                         |
| 3  | case work*.tw.                                                                                                                                                                                                                        |
| 4  | social workers/                                                                                                                                                                                                                       |
| 5  | psychiatric social workers/                                                                                                                                                                                                           |
| 6  | Social case work/                                                                                                                                                                                                                     |
| 7  | or/1-6 [social work]                                                                                                                                                                                                                  |
| 8  | (recover* adj3 (care or practic* or educat* or curricul* or teach* or learn* or train* or research* or therap* or support* or orient* or approach* or model? or health or mental health or institutional or capital or natural*)).tw. |
| 9  | "recovery (disorders)"/                                                                                                                                                                                                               |
| 10 | exp Rehabilitation/                                                                                                                                                                                                                   |
| 11 | recover*.tw.                                                                                                                                                                                                                          |
| 12 | 10 and 11                                                                                                                                                                                                                             |
| 13 | 8 or 9 or 12                                                                                                                                                                                                                          |
| 14 | 7 and 13                                                                                                                                                                                                                              |

**Stage 3: study selection**

After generating a list of articles from our search strategy we will engage in an iterative, peer review two-stage screening process with two independent reviewers at each stage. In the first



1  
2  
3 stage, two independent reviewers will screen articles for suitability based on their title and  
4  
5 abstracts. In the second stage, the reviewers will independently conduct a full text review of the  
6  
7 selected articles to ensure their content meets our inclusion criteria outlined below. If there is  
8  
9 ambiguity on whether certain articles fit the scope of this protocol, a third reviewer will be  
10  
11 consulted. We will use Covidence – a web-based software for systematic and scoping reviews  
12  
13 that facilitates screening, study selection, and data extraction.[34] This protocol will focus on  
14  
15 articles written in English only, and selected material will include empirical studies, literature  
16  
17 reviews, dissertations, teaching articles, and conceptual/theoretical papers. There are no outlined  
18  
19 geographical or date restrictions. Articles must meet the following inclusion criteria to be  
20  
21 selected: (1) include the term recovery in the title or abstract, (2) use the term social work or  
22  
23 social worker in the title or abstract, (3) have an explicit focus on recovery which may include  
24  
25 different concepts such as recovery, recovery model, recovery-oriented practice, recovery-  
26  
27 oriented care etc., (4) explicitly focus on social work research, education, training, or practice in  
28  
29 relationship to recovery, and (5) focus on recovery with respect to mental health and/or  
30  
31 addictions. We will exclude books, book reviews, editorials, and gray literature.  
32  
33  
34  
35  
36  
37

#### 38 **Stage 4: charting the data**

39  
40 Key themes extracted from the selected articles will be categorized, summarized, and presented  
41  
42 clearly within a data charting form. The research team developed initial charting variables based  
43  
44 on the research questions and these variables will be used to extract data and identify key themes  
45  
46 from selected articles. The preliminary variables that will be used to categorize information  
47  
48 include (1) authors, (2) year, (3) country where study was conducted or country of first author's  
49  
50 affiliation, (4) journal, (5) format of paper (empirical, literature review, dissertation,  
51  
52 conceptual/theoretical, editorial, teaching article, etc.), (6) definition of recovery, (7) principles  
53  
54  
55  
56  
57  
58  
59  
60

1  
2  
3 of recovery, (8) area of focus (e.g. mental health, addictions, etc.), (9) implementation of  
4 recovery (10) targeted audience (e.g. students, service users, social workers etc.), (11) focus on  
5 equity or access, (12) focus on stigma, (13) focus on race, culture, and/or diversity (14) gaps,  
6 challenges or barriers, and (15) recommendations, evidence-based or best practices. To assess  
7 whether these headings accurately capture the scope and breadth of the content, the reviewers  
8 will have two research assistants independently chart the first five articles that meet our inclusion  
9 criteria and if necessary, refine the definitions for the variables/charting categories. We will also  
10 engage in a constant comparative method and peer review to minimize any discrepancies during  
11 the charting process. The researchers will also engage in a qualitative thematic analysis to  
12 identify and highlight themes present amongst this chart. The charted data will be organized and  
13 presented in a Microsoft Excel spreadsheet.

### 24 **Stage 5: identification, synthesis, and report of study findings**

25 Findings outlined in the charted data will be reviewed, synthesized, and analyzed through a  
26 numerical summary analysis, as well as a qualitative thematic analysis. The final scoping review  
27 will be presented in publications and at upcoming conferences. Study findings will be  
28 disseminated to relevant stakeholders, such as researchers, clinicians, and social work educators.  
29 Anticipated findings are expected to map out the current nature and scope of recovery in social  
30 work practice in mental health and addictions, and the scoping review will provide  
31 recommendations for recovery-oriented social work practice in mental health and addictions.

### 32 **Patients and public involvement**

33 No patients nor members of the public were involved in this project.

## ETHICS AND DISSEMINATION

The scoping review outlined in this paper contributes to our current understanding and will advance knowledge of recovery-oriented social work practice in mental health and addictions.

The information gathered for this paper and the outlined scoping review were retrieved from publicly available sources, therefore ethics approval is not required for this project. The results will be disseminated through a peer-reviewed journal and reported at national and international conferences on mental health and addictions, as well as social work education, practice, and research.

**Contributions of authors:** All authors made substantive intellectual contributions to the development of this protocol. TK and AH developed, wrote, and edited the initial protocol. JL developed the search strategy and contributed to the writing of the protocol. All authors (TK, AH, JL, SM, RA, CCW) critically reviewed and revised the final version prior to submission.

**Funding:** This scoping review protocol is supported by a 2019-2020 Royal Bank of Canada Graduate Fellowship in Applied Social Work Research, Factor-Inwentash Faculty of Social Work, University of Toronto.

**Competing interests:** None declared.

**Data sharing statement:** The dataset is available by contacting the corresponding author.

## References

1. Adams N, Daniels A, Compagni A. International pathways to mental health transformation. *Int J Ment Health* 2009;38(1):30-45.
2. Kidd SA, McKenzie KJ, Virdee G. Mental health reform at a systems level: widening the lens on recovery-oriented care. *Can J Psychiatry* 2014;59(5):243-9.
3. Piat M, Sabetti J. The development of a recovery-oriented mental health system in Canada: what the experience of commonwealth countries tells us. *Can J Commun Ment Health* 2009;28(2):17-33.
4. WHO. *Mental health action plan 2013-2020*. Geneva: World Health Organization, 2013.
5. Deegan PE. Recovery: The lived experience of rehabilitation. *Psychosocial rehabilitation journal* 1988;11(4):11.
6. Carpenter J. Mental health recovery paradigm: Implications for social work. *Health Soc Work* 2002;27(2):86-94.
7. Kuhn TS. *The structure of scientific revolutions*. University of Chicago press; 2012 Apr 18.
8. Ashcroft R, Van Katwyk T, Hogarth K. An examination of the holism paradigm: A view of social work. *Social work in public health. Soc Work Public Health* 2017;32(8):461-74.
9. Anthony WA. Recovery from mental illness: the guiding vision of the mental health service system in the 1990s. *J Psychosoc Rehabil* 1993;16(4):11.
10. Leamy M, Bird V, Le Boutillier C, Williams J, Slade M. Conceptual framework for personal recovery in mental health: systematic review and narrative synthesis. *Br J Psychiatry* 2011 Dec;199(6):445-52.
11. Mental Health Commission of Canada. *Guidelines for recovery-oriented practice*. Ottawa: Mental Health Commission of Canada; 2015.
12. Commonwealth of Australia. *A national framework for recovery-oriented mental health services: policy and theory*.
13. Substance Abuse and Mental Health Services Administration (SAMHSA). *SAMHSA'S working definition of recovery: 10 guiding principles of recovery*. Department of Health and Human Services; 2012. 1-7.
14. Canadian Centre on Substance Use and Addiction. *Moving Toward a Recovery-Oriented System of Care: A Resource for Service Providers and Decision Makers*, 2017. [internet] Ottawa: Canadian Centre on Substance Use and Addiction; 2017. Available from: <https://www.ccsa.ca/sites/default/files/2019-04/CCSA-Recovery-Oriented-System-of-Care-Resource-2017-en.pdf>
15. Davidson G, Brophy L, Campbell J. Risk, recovery and capacity: Competing or complementary approaches to mental health social work. *Aust Soc Work* 2016 Apr 2;69(2):158-68.

16. Hennessy EA. Recovery capital: A systematic review of the literature. *Addict Res Theory* 2017 Sep 3;25(5):349-60.
17. Bartram M. 'It's Really About Wellbeing': a Canadian Investigation of Harm Reduction as a Bridge Between Mental Health and Addiction Recovery. *Int J Ment Health Addict* 2020 Feb 20:1-4.
18. Ashcroft R, Van Katwyk T. Joining the global conversation: Social workers define health using a participatory action research approach. *Br J Soc Work* 2017;47(2):579-96.
19. Ashcroft R, Kourgiantakis T, Fearing G, Robertson T, Brown JB. Social work's scope of practice in primary mental health care: a scoping review. *Br J Soc Work* 2019;49(2):318-34.
20. Straussner SL. The role of social workers in the treatment of addictions: A brief history. *J Soc Work Pract Addict* 2001 Jan 1;1(1):3-9.
21. Whitaker T, Weismiller T, Clark E. *Assuring the sufficiency of a frontline workforce: A national study of licensed social workers*. Executive summary: 2006.
22. Davidson L, White W. The concept of recovery as an organizing principle for integrating mental health and addiction services. *J Behav Health Serv Res* 2007 Apr 1;34(2):109-20.
23. Hyde B, Bowles W, Pawar M. 'We're Still in There'—Consumer Voices on Mental Health Inpatient Care: Social Work Research Highlighting Lessons for Recovery Practice. *Br J Soc Work* 2015;45(suppl\_1): i62-i78.
24. Khoury E, Rodriguez del Barrio L. Recovery-oriented mental health practice: A social work perspective. *Br J Soc Work* 2015;45(suppl\_1): i27-44.
25. Loumpa V. Promoting recovery through peer support: Possibilities for social work practice. *Health Soc Work* 2012;51(1):53-65.
26. Williams CC, Almeida M, Knyahnytska Y. Towards a biopsychosociopolitical frame for recovery in the context of mental illness. *Br J Soc Work* 2015;45(suppl\_1): i9-i26.
27. Le Boutillier C, Leamy M, Bird VJ, Davidson L, Williams J, Slade M. What does recovery mean in practice? A qualitative analysis of international recovery-oriented practice guidance. *Psychiatr. Serv* 2011 Dec;62(12):1470-6.
28. Le Boutillier C, Chevalier A, Lawrence V, Leamy M, Bird VJ, Macpherson R, Williams J, Slade M. Staff understanding of recovery-orientated mental health practice: a systematic review and narrative synthesis. *Implement Sci* 2015 Dec 1;10(1):87.
29. Levac D, Colquhoun H, O'Brien KK. Scoping studies: advancing the methodology. *Implement Sci* 2010;5(1):69.
30. Arksey H, O'Malley L. Scoping studies: towards a methodological framework. *Int J Soc Res Methodol* 2005;8(1):19–32.
31. Tricco AC, Lillie E, Zarin W, O'Brien KK, Colquhoun H, Levac D, Moher D, Peters MD, Horsley T, Weeks L, Hempel S. PRISMA extension for scoping reviews (PRISMA-ScR): checklist and explanation. *Ann Intern Med* 2018;169(7):467-73.

- 1  
2  
3 32. Colquhoun HL, Levac D, O'Brien KK, Straus S, Tricco AC, Perrier L, Kastner M, Moher D.  
4 Scoping reviews: time for clarity in definition, methods, and reporting. *J Clin Epidemiol*  
5 2014;67(12):1291-4.  
6  
7 33. McGowan J, Sampson M, Salzwedel DM, Cogo E, Foerster V, Lefebvre C. PRESS peer  
8 review of electronic search strategies: 2015 guideline statement. *J Clin Epidemiol*  
9 2016;75:40-6.  
10  
11 34. Macdonald M, Misener RM, Weeks L, Helwig M. Covidence vs Excel for the title and  
12 abstract review stage of a systematic review. *Int J Evid Based Healthc* 2016 1;14(4):200-201.  
13  
14  
15  
16  
17  
18  
19  
20  
21  
22  
23  
24  
25  
26  
27  
28  
29  
30  
31  
32  
33  
34  
35  
36  
37  
38  
39  
40  
41  
42  
43  
44  
45  
46  
47  
48  
49  
50  
51  
52  
53  
54  
55  
56  
57  
58  
59  
60

## Appendix A - Preferred Reporting Items for Systematic reviews and Meta-Analyses extension for Scoping Reviews (PRISMA-ScR) Checklist<sup>i</sup>

| SECTION                                               | ITEM | PRISMA-ScR CHECKLIST ITEM                                                                                                                                                                                                                                                                                  | REPORTED ON PAGE #                    |
|-------------------------------------------------------|------|------------------------------------------------------------------------------------------------------------------------------------------------------------------------------------------------------------------------------------------------------------------------------------------------------------|---------------------------------------|
| <b>TITLE</b>                                          |      |                                                                                                                                                                                                                                                                                                            |                                       |
| Title                                                 | 1    | Identify the report as a scoping review.                                                                                                                                                                                                                                                                   | 1                                     |
| <b>ABSTRACT</b>                                       |      |                                                                                                                                                                                                                                                                                                            |                                       |
| Structured summary                                    | 2    | Provide a structured summary that includes (as applicable): background, objectives, eligibility criteria, sources of evidence, charting methods, results, and conclusions that relate to the review questions and objectives.                                                                              | 2                                     |
| <b>INTRODUCTION</b>                                   |      |                                                                                                                                                                                                                                                                                                            |                                       |
| Rationale                                             | 3    | Describe the rationale for the review in the context of what is already known. Explain why the review questions/objectives lend themselves to a scoping review approach.                                                                                                                                   | 4-6                                   |
| Objectives                                            | 4    | Provide an explicit statement of the questions and objectives being addressed with reference to their key elements (e.g., population or participants, concepts, and context) or other relevant key elements used to conceptualize the review questions and/or objectives.                                  | 6-7                                   |
| <b>METHODS</b>                                        |      |                                                                                                                                                                                                                                                                                                            |                                       |
| Protocol and registration                             | 5    | Indicate whether a review protocol exists; state if and where it can be accessed (e.g., a Web address); and if available, provide registration information, including the registration number.                                                                                                             | Protocol in BMJ Open                  |
| Eligibility criteria                                  | 6    | Specify characteristics of the sources of evidence used as eligibility criteria (e.g., years considered, language, and publication status), and provide a rationale.                                                                                                                                       | 10                                    |
| Information sources*                                  | 7    | Describe all information sources in the search (e.g., databases with dates of coverage and contact with authors to identify additional sources), as well as the date the most recent search was executed.                                                                                                  | 8 for sources (date N/A for protocol) |
| Search                                                | 8    | Present the full electronic search strategy for at least 1 database, including any limits used, such that it could be repeated.                                                                                                                                                                            | 9                                     |
| Selection of sources of evidence†                     | 9    | State the process for selecting sources of evidence (i.e., screening and eligibility) included in the scoping review.                                                                                                                                                                                      | 10                                    |
| Data charting process‡                                | 10   | Describe the methods of charting data from the included sources of evidence (e.g., calibrated forms or forms that have been tested by the team before their use, and whether data charting was done independently or in duplicate) and any processes for obtaining and confirming data from investigators. | 10-11                                 |
| Data items                                            | 11   | List and define all variables for which data were sought and any assumptions and simplifications made.                                                                                                                                                                                                     | Preliminary variables on 10-11        |
| Critical appraisal of individual sources of evidence§ | 12   | If done, provide a rationale for conducting a critical appraisal of included sources of evidence; describe                                                                                                                                                                                                 | N/A                                   |



| SECTION                                       | ITEM | PRISMA-ScR CHECKLIST ITEM                                                                                                                                                                       | REPORTED ON PAGE # |
|-----------------------------------------------|------|-------------------------------------------------------------------------------------------------------------------------------------------------------------------------------------------------|--------------------|
|                                               |      | the methods used and how this information was used in any data synthesis (if appropriate).                                                                                                      |                    |
| Synthesis of results                          | 13   | Describe the methods of handling and summarizing the data that were charted.                                                                                                                    | 11                 |
| <b>RESULTS</b>                                |      |                                                                                                                                                                                                 |                    |
| Selection of sources of evidence              | 14   | Give numbers of sources of evidence screened, assessed for eligibility, and included in the review, with reasons for exclusions at each stage, ideally using a flow diagram.                    | N/A                |
| Characteristics of sources of evidence        | 15   | For each source of evidence, present characteristics for which data were charted and provide the citations.                                                                                     | N/A                |
| Critical appraisal within sources of evidence | 16   | If done, present data on critical appraisal of included sources of evidence (see item 12).                                                                                                      | N/A                |
| Results of individual sources of evidence     | 17   | For each included source of evidence, present the relevant data that were charted that relate to the review questions and objectives.                                                           | N/A                |
| Synthesis of results                          | 18   | Summarize and/or present the charting results as they relate to the review questions and objectives.                                                                                            | N/A                |
| <b>DISCUSSION</b>                             |      |                                                                                                                                                                                                 |                    |
| Summary of evidence                           | 19   | Summarize the main results (including an overview of concepts, themes, and types of evidence available), link to the review questions and objectives, and consider the relevance to key groups. | N/A                |
| Limitations                                   | 20   | Discuss the limitations of the scoping review process.                                                                                                                                          | 3 for protocol     |
| Conclusions                                   | 21   | Provide a general interpretation of the results with respect to the review questions and objectives, as well as potential implications and/or next steps.                                       | N/A                |
| <b>FUNDING</b>                                |      |                                                                                                                                                                                                 |                    |
| Funding                                       | 22   | Describe sources of funding for the included sources of evidence, as well as sources of funding for the scoping review. Describe the role of the funders of the scoping review.                 | 12                 |

JBI = Joanna Briggs Institute; PRISMA-ScR = Preferred Reporting Items for Systematic reviews and Meta-Analyses extension for Scoping Reviews.

\* Where *sources of evidence* (see second footnote) are compiled from, such as bibliographic databases, social media platforms, and Web sites.

† A more inclusive/heterogeneous term used to account for the different types of evidence or data sources (e.g., quantitative and/or qualitative research, expert opinion, and policy documents) that may be eligible in a scoping review as opposed to only studies. This is not to be confused with *information sources* (see first footnote).

‡ The frameworks by Arksey and O'Malley (6) and Levac and colleagues (7) and the JBI guidance (4, 5) refer to the process of data extraction in a scoping review as data charting.

§ The process of systematically examining research evidence to assess its validity, results, and relevance before using it to inform a decision. This term is used for items 12 and 19 instead of "risk of bias" (which is more applicable to systematic reviews of interventions) to include and acknowledge the various sources of evidence that may be used in a scoping review (e.g., quantitative and/or qualitative research, expert opinion, and policy document).

<sup>i</sup> Some of the items are not applicable (N/A) due to the fact this manuscript is a scoping review protocol.
